# Supplementary material for: Enhanced hydrogen storage properties of a dual-cation (Li+, Mg2+) borohydride and its dehydrogenation mechanism
Source: Royal Society of Chemistry journal article supplement (doi:10.1039/c7ra06599j), 2017-01-01
Supplement: c7ra06599j1.pdf [file c7ra06599j1.pdf]

## Enhanced hydrogen storage properties of a dual-cation ( $\text{Li}^+$ , $\text{Mg}^{2+}$ ) borohydride and its dehydrogenation mechanism

Liuting Zhang <sup>a,b,§</sup>, Jianguang Zheng <sup>a,c,§</sup>, Xuezhong Xiao <sup>a,\*</sup>, Xiulin Fan <sup>d</sup>, Xu Huang <sup>a</sup>, Xinlin Yang <sup>b</sup>, Lixin Chen <sup>a,c,\*</sup>

<sup>a</sup> State Key Laboratory of Silicon Materials, School of Materials Science and Engineering, Zhejiang University, Hangzhou 310027, P.R. China

<sup>b</sup> School of Energy and Power, Jiangsu University of Science and Technology, Zhenjiang 212003, P.R. China

<sup>c</sup> Key Laboratory of Advanced Materials and Applications for Batteries of Zhejiang Province, Hangzhou 310013, P.R. China

<sup>d</sup> Department of Chemical and Biomolecular Engineering, University of Maryland, College Park, MD 20742, USA.

§ Liuting Zhang and Jianguang Zheng contributed equally.

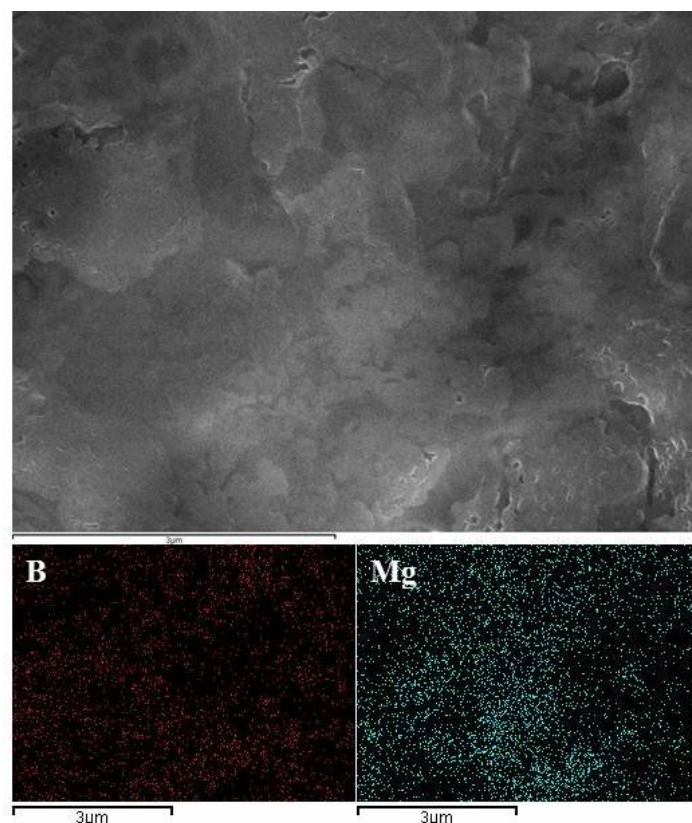

**Fig. s1** EDS mapping profiles of Li-Mg-B-H compound.

\*Corresponding author. Tel./fax: +86 571 87951152.

E-mail address: lxchen@zju.edu.cn (L.X. Chen); xzxiao@zju.edu.cn (X.Z. Xiao).

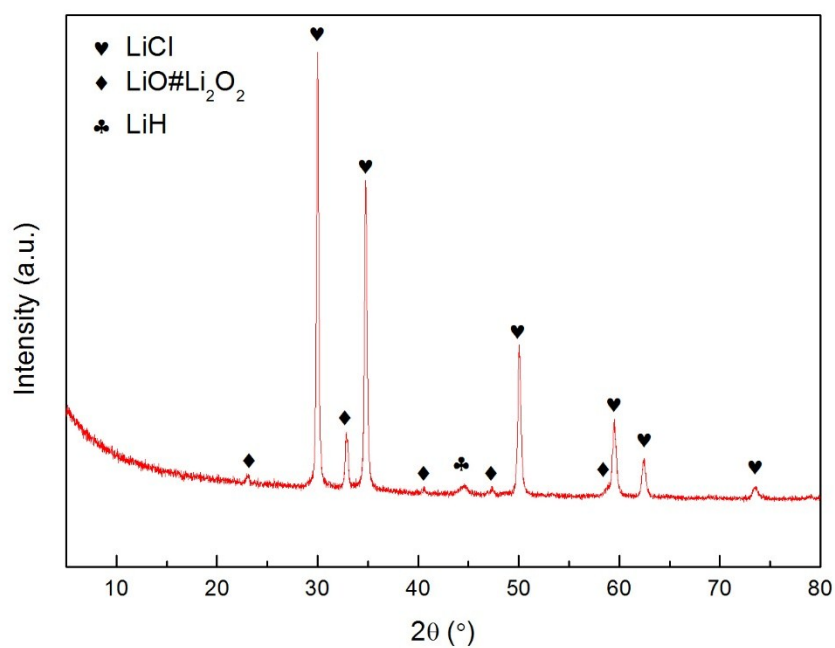

**Fig. s2** XRD pattern of filter residue of Li-Mg-B-H.

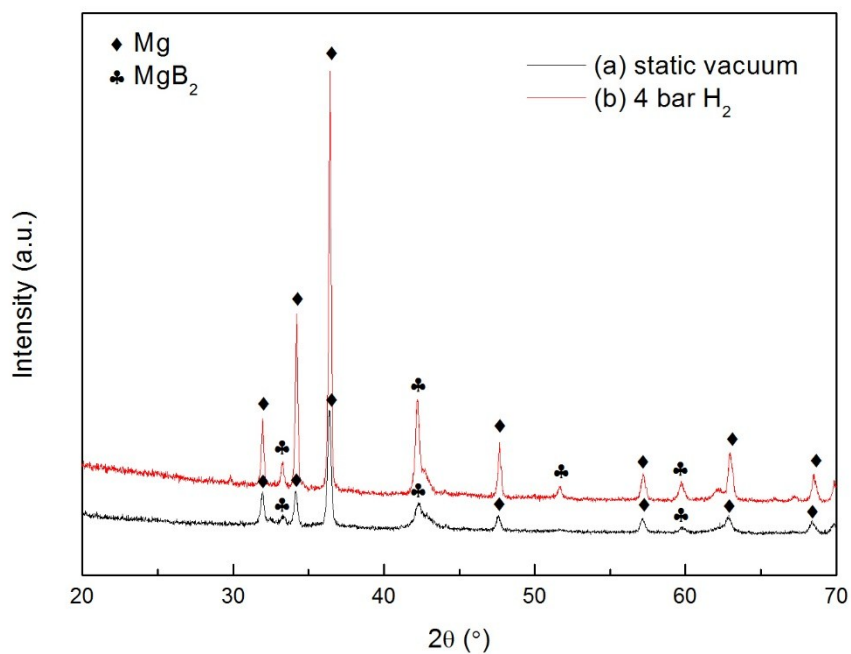

**Fig. s3** XRD patterns of Li-Mg-B-H decomposed from room temperature to 500 °C at different initial hydrogen pressure (a) static vacuum and (b) 4 bar.

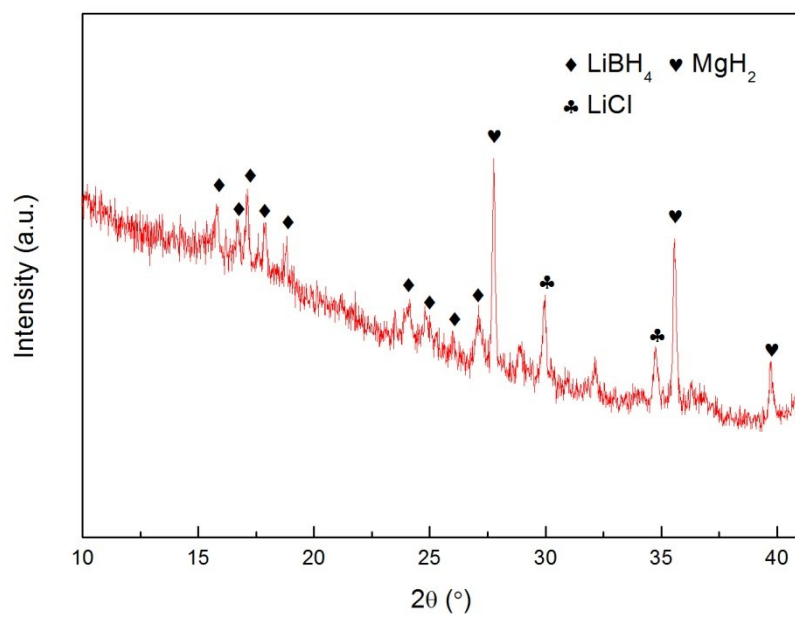

**Fig. s4** XRD pattern of the rehydrogenated sample of Li-Mg-B-H.
